# Supplementary material for: Consistent genes associated with structural changes in clinical Alzheimer’s disease spectrum
Source: Frontiers journal article supplement (doi:10.3389/fnins.2024.1376288), 2024-11-01
Supplement: Data_Sheet_1.pdf [file Data_Sheet_1.pdf]

## Supplementary Material

### 1 Supplementary Figures

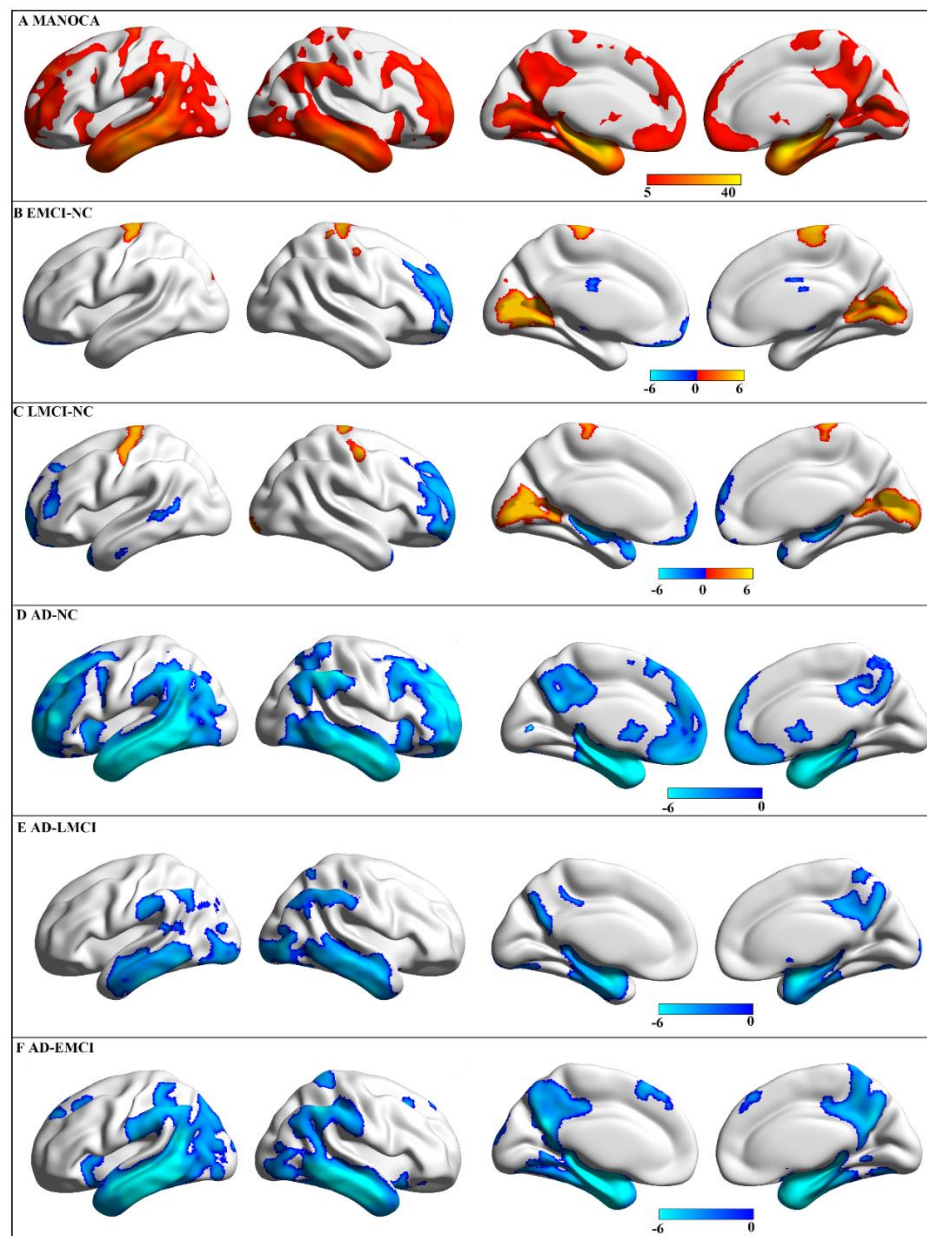

**Supplementary Figure S1.** The altered gray matter volume among Alzheimer's disease spectrum. The results were obtained by multivariate analysis of variance (MANOVA) among EMCI, LMCI, AD, and NC, and post-hoc analyses between any two groups. The results were corrected using

Gaussian random field (GRF, a cluster level of  $p < 0.05$  and a voxel level of  $p < 0.001$ ). There is no significant difference between EMCI and LMCI.

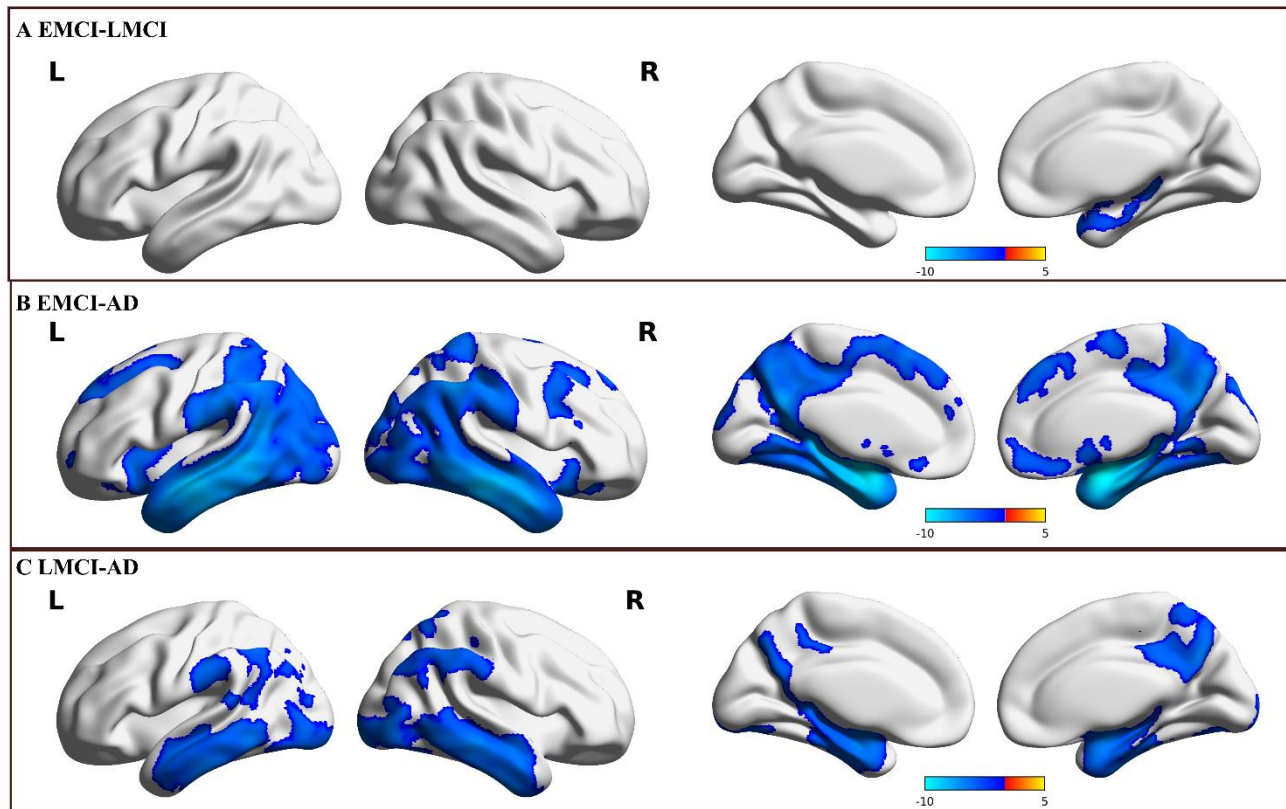

**Supplementary Figure S2.** The altered gray matter volume among Alzheimer's disease different stages. The results were obtained by two sample t-tests among EMCI, LMCI, and AD. The results

were corrected using Gaussian random field (GRF, a voxel level of  $p < 0.001$  and a cluster level of  $p < 0.05$ ).

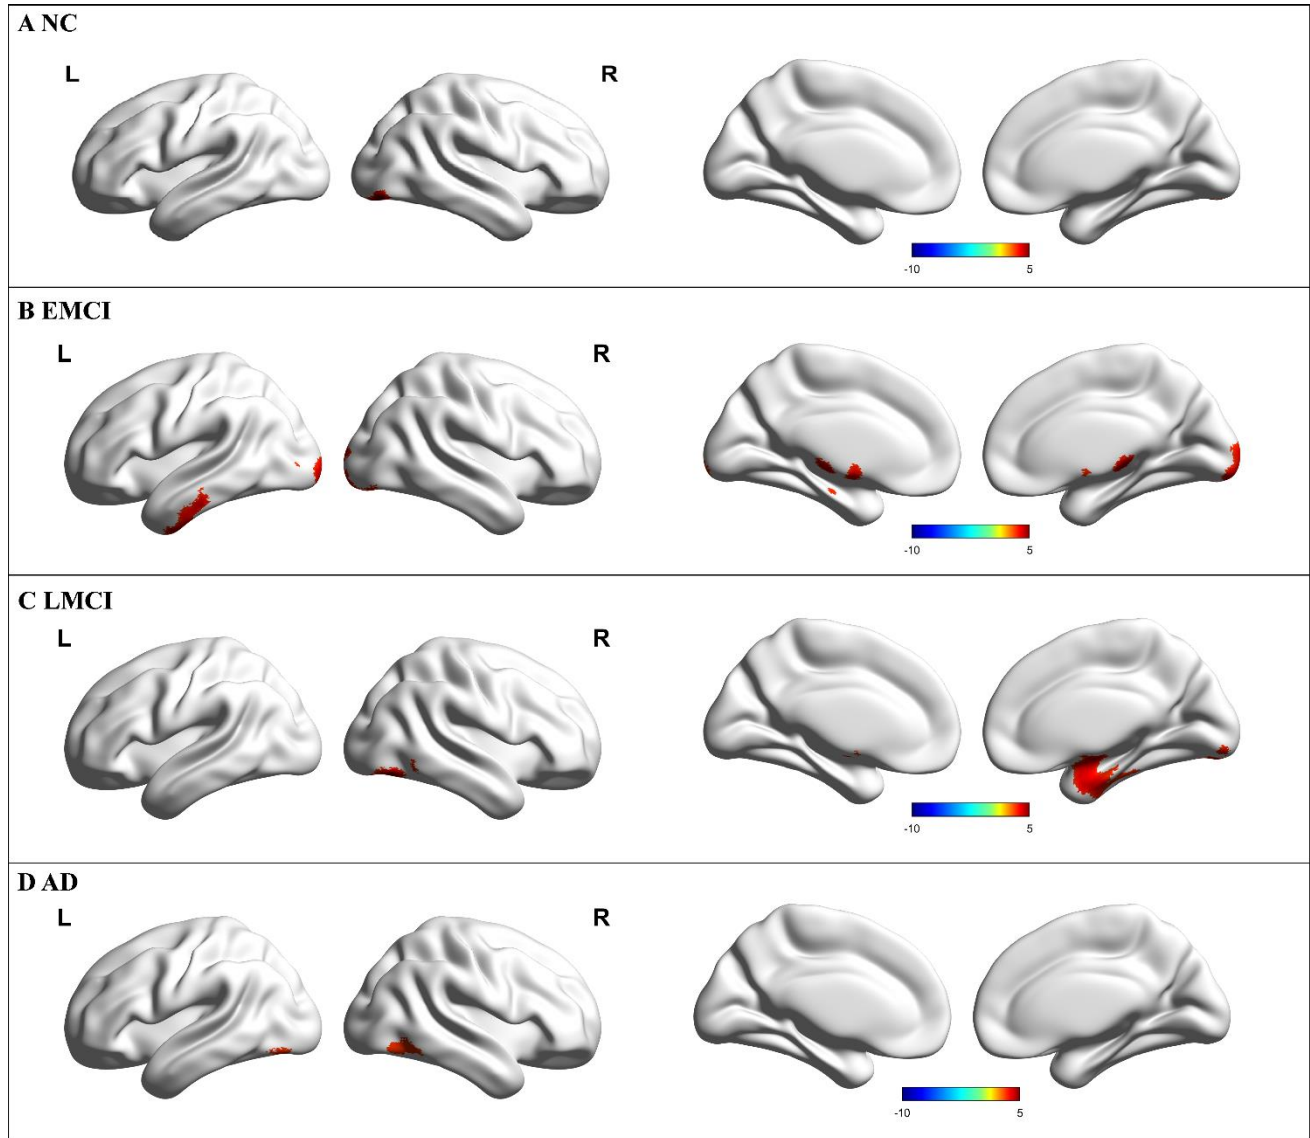

**Supplementary Figure S3.** The altered gray matter volume between female and male in each group. The results were obtained by two sample t-tests among NC, EMCI, LMCI, and AD. The results were corrected using Gaussian random field (GRF, a voxel level of  $p < 0.001$  and a cluster level of  $p < 0.05$ ).
